# Supplementary material for: Assessing national exposure to and impact of glacial lake outburst floods considering uncertainty under data sparsity
Source: Copernicus journal article supplement (doi:10.5194/hess-29-733-2025), 2025-02-07
Supplement: Supplementary file 1 [file hess-29-733-2025-supplement.pdf]

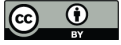

*Supplement of*

## **Assessing national exposure to and impact of glacial lake outburst floods considering uncertainty under data sparsity**

**Huili Chen et al.**

*Correspondence to:* Qiuhua Liang (q.liang@lboro.ac.uk)

The copyright of individual parts of the supplement might differ from the article licence.

**Table S1 Hydropower plants potentially impacted by GLOFs from the 21 identified dangerous glacial lakes**

| ID | Project                                 | River        | Capacity (Megawatt MW) | License type | Commission /issue year | Corrected longitude | Corrected latitude | Lake(s) that may pose risks                                        |
|----|-----------------------------------------|--------------|------------------------|--------------|------------------------|---------------------|--------------------|--------------------------------------------------------------------|
| 1  | Madhya Marsyangdi                       | Marsyangdi   | 70                     | Operation    | 2000                   | 84.4998             | 27.9322            | Thulagi                                                            |
| 2  | Marsyangdi                              | Marsyangdi   | 69                     | Operation    | 1994                   | 84.5407             | 27.8765            | Thulagi                                                            |
| 3  | Upper Marsyangdi A                      | Marsyangdi   | 50                     | Operation    | 2011                   | 84.3624             | 28.2828            | Thulagi                                                            |
| 4  | Devighat                                | Trishuli     | 14.1                   | Operation    | 1994                   | 85.1344             | 27.8874            | Anonymous 12                                                       |
| 5  | Trishuli                                | Trishuli     | 24                     | Operation    | 1994                   | 85.1462             | 27.9207            | Anonymous 12                                                       |
| 6  | Lower Khare                             | Khare        | 11                     | Generation   | 2012                   | 86.2121             | 27.7560            | Tsho Rolpa                                                         |
| 7  | Langtang Khola Small Hydropower Project | Langtang     | 10                     | Generation   | 2015                   | 85.3535             | 28.1550            | Anonymous 12                                                       |
| 8  | Marsyangdi Besi                         | Marsyangdi   | 50                     | Generation   | 2017                   | 84.3809             | 28.2329            | Thulagi                                                            |
| 9  | Tamakoshi V                             | Tama Koshi   | 87                     | Generation   | 2017                   | 86.2137             | 27.7897            | Tsho Rolpa                                                         |
| 10 | Upper Tamakoshi HPP                     | Tama Koshi   | 456                    | Generation   | 2010                   | 86.2217             | 27.8796            | Tsho Rolpa                                                         |
| 11 | Middle Tamor                            | Tamor        | 54                     | Generation   | 2017                   | 87.6851             | 27.4077            | Anonymous 1, Anonymous 2                                           |
| 12 | Upper Tamor                             | Tamor        | 285                    | Generation   | 2018                   | 87.7349             | 27.4737            | Anonymous 1, Anonymous 2, Anonymous 3                              |
| 13 | Super Trishuli                          | Trishuli     | 100                    | Generation   | 2017                   | 84.6421             | 27.8609            | Thulagi                                                            |
| 14 | Trishuli Galchhi                        | Trishuli     | 75                     | Generation   | 2016                   | 85.0195             | 27.8284            | Anonymous 12                                                       |
| 15 | Upper Trishuli 3A                       | Trishuli     | 60                     | Generation   | 2010                   | 85.2000             | 28.0457            | Anonymous 12                                                       |
| 16 | Upper Trishuli 3B                       | Trishuli     | 37                     | Generation   | 2013                   | 85.1850             | 28.0046            | Anonymous 12                                                       |
| 17 | Upper Trishuli-1                        | Trishuli     | 216                    | Generation   | 2017                   | 85.2611             | 28.0964            | Anonymous 12                                                       |
| 18 | Arun 3                                  | Arun         | 900                    | Survey       | 2008                   | 87.1665             | 27.3767            | Lower Barun                                                        |
| 19 | Upper Barunkhola HEP                    | Barun        | 55                     | Survey       | 2017                   | 87.2775             | 27.7259            | Anonymous 9, Lower Barun                                           |
| 20 | Lower Barun Khola HPP                   | Barun Khola  | 132                    | Survey       | 2014                   | 87.3307             | 27.6996            | Anonymous 9, Lower Barun                                           |
| 21 | Chujung Khola HEP                       | Chujung      | 48                     | Survey       | 2018                   | 87.4768             | 27.7561            | Anonymous 4, Anonymous 5                                           |
| 22 | Dana Khola Hydropower Project           | Dana Khola   | 19                     | Survey       | 2017                   | 84.3779             | 28.5156            | Thulagi                                                            |
| 23 | Dudhkoshi-6 HEP                         | Dudh Koshi   | 83                     | Survey       | 2015                   | 86.7139             | 27.6829            | Imja Tsho, Lumding                                                 |
| 24 | Dudhkoshi 10 HEP                        | Dudh koshi   | 75                     | Survey       | 2017                   | 86.7205             | 27.7726            | Imja Tsho                                                          |
| 25 | Dudhkoshi-9 HPP                         | Dudh koshi   | 111                    | Survey       | 2016                   | 86.7116             | 27.7256            | Imja Tsho                                                          |
| 26 | Surke Dudhkoshi HEP                     | Dudh Koshi   | 350                    | Survey       | 2017                   | 86.6810             | 27.5652            | Imja Tsho, Lumding                                                 |
| 27 | Ghunsa Khola HPP                        | Ghunsa khola | 155.82                 | Survey       | 2017                   | 87.8884             | 27.6181            | Anonymous 2, Anonymous 3                                           |
| 28 | Ghunsa Khola HPP                        | Ghunsa Khola | 71.5                   | Survey       | 2016                   | 87.8314             | 27.5504            | Anonymous 2, Anonymous 3                                           |
| 29 | Hongu Khola HPP                         | Hongu Khola  | 21.87                  | Survey       | 2016                   | 86.8950             | 27.5567            | Anonymous 7, Hongu 1, Anonymous 8, Hongu 2, Chamlang, Anonymous 10 |

|    |                                            |                |       |        |      |         |         |                                                                    |
|----|--------------------------------------------|----------------|-------|--------|------|---------|---------|--------------------------------------------------------------------|
| 30 | Hongu Khola I HEP                          | Hongu Khola    | 18.64 | Survey | 2017 | 86.7854 | 27.4821 | Anonymous 7, Hongu 1, Anonymous 8, Hongu 2, Chamlang, Anonymous 10 |
| 31 | Middle Hongu Khola B HPP                   | Hongu Khola    | 22.9  | Survey | 2017 | 86.8298 | 27.5014 | Anonymous 7, Hongu 1, Anonymous 8, Hongu 2, Chamlang, Anonymous 10 |
| 32 | Middle Hongukhola A Hydropower Project     | Hongu Khola    | 22    | Survey | 2017 | 86.8781 | 27.5237 | Anonymous 7, Hongu 1, Anonymous 8, Hongu 2, Chamlang, Anonymous 10 |
| 33 | Super Inkhu Khola                          | Inkhu          | 22.12 | Survey | 2017 | 86.7935 | 27.6129 | Anonymous 11                                                       |
| 34 | Upper Inkhu Khola HEP                      | Inkhu          | 24.22 | Survey | 2017 | 86.7845 | 27.5847 | Anonymous 11                                                       |
| 35 | Lower Isuwa Khola HPP                      | Isuwa Khola    | 37.7  | Survey | 2017 | 87.2503 | 27.5583 | Lower Barun                                                        |
| 36 | Lantang Khola Reservoir Hydropower Project | Langtang       | 310   | Survey | 2016 | 85.4406 | 28.1801 | Anonymous 12                                                       |
| 37 | Mathillo Langtang HEP                      | Langtang       | 24.35 | Survey | 2017 | 85.5378 | 28.2097 | Anonymous 12                                                       |
| 38 | Luja Khola HPP                             | Luja Khola     | 24.8  | Survey | 2017 | 86.6862 | 27.6735 | Lumding                                                            |
| 39 | Lower Nyadi HPP                            | Nyadi          | 10.5  | Survey | 2017 | 84.4006 | 28.3122 | Thulagi                                                            |
| 40 | Rolwaling Khola                            | Rolwaling      | 22    | Survey | 2017 | 86.2505 | 27.8900 | Tsho Rolpa                                                         |
| 41 | Rolwaling Khola HPP                        | Rolwaling      | 88    | Survey | N/A  | 86.2937 | 27.9045 | Tsho Rolpa                                                         |
| 42 | Ghunsa-Tamor HPP                           | Tamor          | 43    | Survey | 2017 | 87.7979 | 27.5442 | Anonymous 1, Anonymous 6                                           |
| 43 | Super Tamor                                | Tamor          | 155   | Survey | 2016 | 87.8016 | 27.6088 | Anonymous 1, Anonymous 6                                           |
| 44 | Tamor Khola-5 HEP                          | Tamor          | 40    | Survey | 2017 | 87.7984 | 27.5205 | Anonymous 1, Anonymous 2, Anonymous 3, Anonymous 6                 |
| 45 | Tamor Mewa                                 | Tamor          | 128   | Survey | 2013 | 87.6236 | 27.3711 | Anonymous 1, Anonymous 2                                           |
| 46 | Upper Tamor A HPP                          | Tamor          | 72    | Survey | 2017 | 87.7744 | 27.6826 | Anonymous 1                                                        |
| 47 | Upper Tamor HEP                            | Tamor          | 32.5  | Survey | 2017 | 87.8000 | 27.5633 | Anonymous 1, Anonymous 6                                           |
| 48 | Upper Trishuli-I Cascade HEP               | Trishuli Ganga | 24.6  | Survey | 2018 | 85.2084 | 28.0724 | Anonymous 12                                                       |
| 49 | Trishuli Khola                             | Trishuli Khola | 4.409 | Survey | 2017 | 85.2915 | 28.1224 | Anonymous 12                                                       |
